# Supplementary material
Source: PubMed Central journal article supplement (PMC539145)
Supplement: mbc_E04-07-0565_1.pdf [file mbc_E04-07-0565_1.pdf]

**Supplementary Table 1.** Predicted coiled-coil regions  
Russell coil prediction = > 0.9 for 28 residue frame.

| <b>Formin</b> | <b>Coiled-coil</b> | <b>Start FH1</b> |
|---------------|--------------------|------------------|
| MDia1         | 470-560            | 572              |
| MDia2         | 480-530            | 551              |
| MDia3         | 380-420, 493-540   | 544              |
| Gg2           | 505-545            | 572              |
| Ci1           | 455-515            | 534              |
| Dm Dia        | 455-500            | 514              |
|               |                    |                  |
| DAAM1         | 440-530            | 550              |
| DAAM2         | 430-520            | 522              |
| Tr5           | 445-530            | 534              |
| Dm1           | 725-870            | 888              |
| Ce5           | 265-300            | 320              |
|               |                    |                  |
| FRL1          | 385-450            | 537              |
| FRL2          | 340-420            | 455              |
| FRL3          | 470-580            | 623              |
| FRL Tr1       | 365-410            | 520              |
| FRL Tr6       | 380-480            | 533*             |
| Ci4           | 375-415            | 508              |
| Dm2           | 570-655            | 696              |
| Ce3           | 395-425, 455-495   | 508              |
|               |                    |                  |
| FHOD1         | None (<0.05)***    | 587              |
| FHOD2         | 440-470            | 836              |
| FHOD Tr21     | 235-260            | 640              |
| FHOD Dm       | 570-600            | 658              |
| FHOD Ce       | None (0.1)         | 503              |
|               |                    |                  |
| INF1          | None (<0.05)       | 35               |
| INF2          | None (<0.05)       | 3                |
| Tr20          | None (<0.05)       | 373              |
| Ci6           | None (<0.05)       | 143              |
| Dm7           | None (<0.05)       | 271              |
| Ce2           | None (<0.05)       | 67               |
|               |                    |                  |
| Delphinin     | None (<0.05)       | 563              |
| Tr15          | None (<0.05)       | 352              |
| Tr16          | None (<0.05)       | 481              |
| Dr            | None (<0.05)       | 442              |
| Ci2           | None (<0.05)       | 525              |
|               |                    |                  |
| FMN1          | 760-790            | 871              |

|          |                              |       |
|----------|------------------------------|-------|
| FMN2     | 650-690                      | 894   |
| Gg1      | 545-570                      | 652   |
| Dm Cappu | None (0.07)                  | 633   |
|          |                              |       |
| Bnr1p    | 710-805, 870-910             | 1239  |
| Nc       | 721-758/766-810              | 1030  |
| An       | 845-900                      | 1015  |
| Scast    | 210-245/705-775/985-1020**** | 1193  |
| Kw       | 705-745/855-882*****         | 1226  |
| Ag       | 690-760*****                 | 1250  |
|          |                              |       |
| Um2      | 680-755                      | 988   |
|          |                              |       |
| Cdc12    | 680-710                      | 905   |
| Fus1     | None (<0.05)                 | 802   |
| For3     | 540-640                      | 732   |
|          |                              |       |
| Bnr1p    | 520-600                      | 766   |
| Ag1      | 480-570                      | 702   |
| Ag3      | 492-520/540-567              | 735   |
|          |                              |       |
| Dd1      | 485-515                      | 534** |
| Dd2      | 485-515                      | 545   |
| Dd3      | 590-640                      | 650   |
| Dd4      | 335-360, 415-475             | 569   |

\*Could not locate an FH1. FH2 starts at 533.

\*\* no Ps, but a bunch of Ns that end at 558. FH2 starts at 601.

\*\*\*0.6 predicted coiled-coil in a 21 residue window (445-465).

\*\*\*\*0.8 predicted coiled-coil in a 28 residue window (850-877).

\*\*\*\*\*0.85 (750-777) and 0.35 (900-927) predicted coiled-coil in 28 residue windows.

\*\*\*\*\*0.55 predicted coiled-coil in 28 residue window (910-937).
